# Supplementary material for: Iron oxide/porous carbon as a heterogeneous Fenton catalyst for fast decomposition of hydrogen peroxide and efficient removal of methylene blue
Source: Royal Society of Chemistry journal article supplement (doi:10.1039/c6ta07457j), 2016-11-28
Supplement: c6ta07457j1.pdf [file c6ta07457j1.pdf]

## Supporting Information

for

# Iron oxide/porous carbon as a heterogeneous Fenton catalyst for fast decomposition of hydrogen peroxide and efficient removal of methylene blue

Seung Hwa Yoo<sup>a</sup>, Dawon Jang<sup>a,b</sup>, Han-Ik Joh<sup>a,b</sup>, and Sungho Lee<sup>a,b\*</sup>

*Carbon Convergence Materials Research Center, Institute of Advanced Composite Materials, Korea Institute of Science and Technology, Chudong-ro, Bongdong-eup, Wanju-gun, Jeollabuk-do 565-905, Republic of Korea*

*Department of Nanomaterials Engineering, Korea University of Science and Technology, 217 Gajeong-ro, Tuseong-gu, Daejeon, 305-350 Republic of Korea*

*E-mail: [sunghol@kist.re.kr](mailto:sunghol@kist.re.kr)*

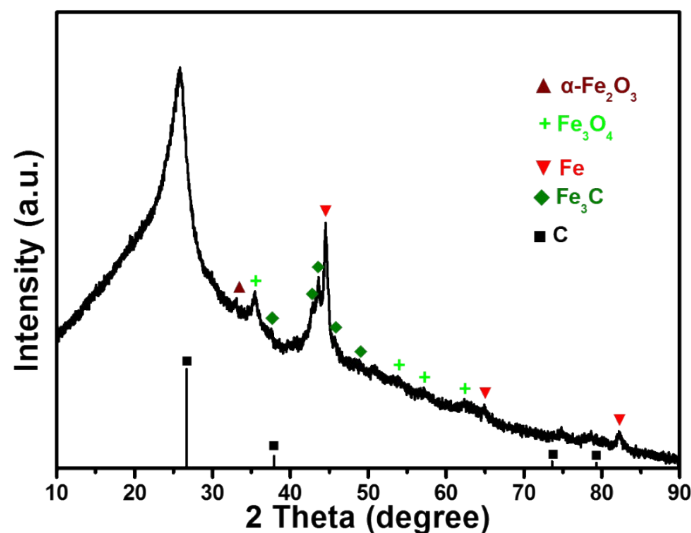

Figure S1. X-ray diffraction (XRD) pattern of Fe<sub>3</sub>O<sub>4</sub>/Fe/Fe<sub>3</sub>C@PCNF.

The XRD pattern of Fe<sub>3</sub>O<sub>4</sub>/Fe/Fe<sub>3</sub>C@PCNF is shown in Figure S1, revealing that various diffraction peaks were observed. The most intense diffraction peak was located at  $2\theta = 25.84^\circ$ , which originated from the graphitic structure of PCNF. Interestingly, the  $2\theta$  of PCNF was lower than the  $2\theta$  of graphite (002) plane ( $2\theta = 26.38^\circ$ , JCPDS No. 41-1487). The d-spacing was calculated as 3.44 Å, which well matches with the TEM observation. From this observation, the graphitic structure of PCNF was implied to not be perfect graphite; rather, it has a graphitic structure with larger d-spacing. In addition to the graphitic diffraction peak, various diffraction peaks were derived from the catalyst particle Fe<sub>3</sub>O<sub>4</sub>/Fe/Fe<sub>3</sub>C. The most intense diffractions could be observed by  $\alpha$ -Fe ( $2\theta = 44.67, 65.02, \text{ and } 82.33^\circ$ , JCPDS No. 06-0696) and Fe<sub>3</sub>C ( $2\theta = 37.65, 42.87, 43.74, 45.85, \text{ and } 49.10^\circ$ , JCPDS No. 34-0001). Fe<sub>3</sub>O<sub>4</sub> ( $2\theta = 35.42, 53.39, 56.94, \text{ and } 62.52^\circ$ , JCPDS No. 19-0629) was also detected with a trace amount of  $\alpha$ -Fe<sub>2</sub>O<sub>3</sub> ( $2\theta = 33.15^\circ$ , JCPDS No. 33-0664).

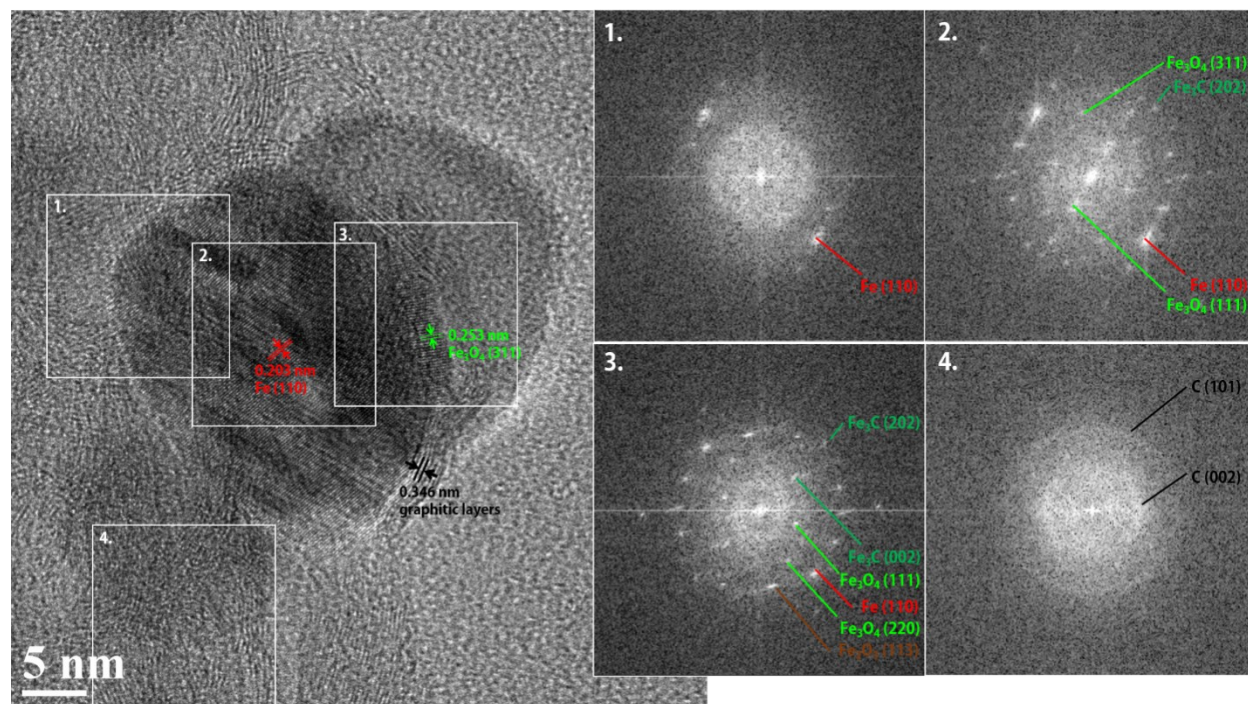

Figure S2. High resolution-TEM image of catalyst nanoparticles located at the outermost edge of  $\text{Fe}_3\text{O}_4/\text{Fe}/\text{Fe}_3\text{C}@PCNF$  and its corresponding fast Fourier transform (FFT) patterns at the different regions selected.

The FFT patterns of  $\text{Fe}_3\text{O}_4/\text{Fe}/\text{Fe}_3\text{C}@PCNF$  were analyzed by changing the selected regions of the high-resolution TEM image. Regions 1, 2, and 3 were selected to observe the phases at different positions of  $\text{Fe}_3\text{O}_4/\text{Fe}/\text{Fe}_3\text{C}$ . In region 1, only Fe (110) was observable, i.e., the phase of catalyst particle most deeply embedded in PCNF was  $\alpha$ -Fe. However, in region 2, diffractions of  $\text{Fe}_3\text{O}_4$  (311), (111) and  $\text{Fe}_3\text{C}$  (202) were detected along with Fe (110). Hence, by moving toward the surface of  $\text{Fe}_3\text{O}_4/\text{Fe}/\text{Fe}_3\text{C}@PCNF$  (region 1  $\rightarrow$  2), iron oxide starts to be observed in the catalyst particle. Finally, in region 3, additional diffraction peaks of  $\text{Fe}_3\text{O}_4$  (220),  $\text{Fe}_3\text{C}$  (002), and  $\alpha$ - $\text{Fe}_2\text{O}_3$  (113) were observed. Therefore, it is evident that  $\text{Fe}_3\text{O}_4$  exists near the surface side of  $\text{Fe}_3\text{O}_4/\text{Fe}/\text{Fe}_3\text{C}@PCNF$  and that Fe exists closer to the central region of

$\text{Fe}_3\text{O}_4/\text{Fe}/\text{Fe}_3\text{C}@$ PCNF. In region 4, the diffusive ring patterns of C (002) and (101) reflect the existence of a graphitic structure developed in PCNF.

**Table S1.** Rate constants of various iron oxide (1-11), iron oxide composite (12-13), and supported iron oxide (14-19) catalysts studied by other groups.

|    | Catalyst                                                                                    | $k_{obsd}$<br>[ $\times 10^{-3} \text{ min}^{-1}$ ] | $k_{mass}$<br>[ $\times 10^{-3} \text{ min}^{-1}$<br>(g/L) <sup>-1</sup> ] | $k_{mass}$<br>[M <sup>-1</sup> s <sup>-1</sup> ] | pH             | Reference                                          |
|----|---------------------------------------------------------------------------------------------|-----------------------------------------------------|----------------------------------------------------------------------------|--------------------------------------------------|----------------|----------------------------------------------------|
| 1  | Goethite ( $\alpha$ -FeOOH)                                                                 | 9.8 $\pm$ 1.0                                       | 19.6 $\pm$ 2.0                                                             | 0.019-0.067                                      | 5-10           | Environ. Sci. Technol. <b>1998</b> , 32, 1417-1423 |
| 2  | Goethite                                                                                    | 0.530                                               | 0.530                                                                      | -                                                | 6.4            | Water Res. <b>2001</b> , 35, 2291-2299             |
| 3  | Goethite                                                                                    | 13                                                  | 0.001                                                                      | -                                                | 7.7            | J. Environ. Eng. <b>1998</b> , 124, 31-38          |
| 4  | Hematite ( $\alpha$ -Fe <sub>2</sub> O <sub>3</sub> )                                       | 26.4                                                | 26.4                                                                       | -                                                | 6.3-6.5        | J. Am. Chem. Soc. <b>2007</b> , 129, 10929-10936   |
| 5  | Hematite                                                                                    | 0.083                                               | -                                                                          | -                                                | 5.94           | Water Res. <b>2001</b> , 35, 2291-2299             |
| 6  | Hematite                                                                                    | 143                                                 | 143                                                                        | -                                                | 6.3-6.5        | J. Mater. Chem. A, <b>2016</b> , 4, 596-604        |
| 7  | Ferrihydrite                                                                                | 15                                                  | 0.012                                                                      | -                                                | 7.7            | J. Environ. Eng. <b>1998</b> , 124, 31-38          |
| 8  | Ferrihydrite (granular)                                                                     | 9.0                                                 | -                                                                          | -                                                | 8.00           | Water Res. <b>2001</b> , 35, 2291-2299             |
| 9  | Ferrihydrite                                                                                | 7.6                                                 | 0.0151                                                                     | -                                                | 7.0            | J. Environ. Eng. <b>1998</b> , 124, 31-38          |
| 10 | Magnetite (Fe <sub>3</sub> O <sub>4</sub> )                                                 | 0.23                                                | -                                                                          | -                                                | 5.5            | J. Nanopart. Res. <b>2012</b> , 14, 956-965        |
| 11 | Magnetite                                                                                   | 0.001 M                                             | -                                                                          | -                                                | 5.5            | Chemosphere, <b>2005</b> , 60, 1118-1123           |
| 12 | Fe <sup>0</sup> /Fe <sub>3</sub> O <sub>4</sub>                                             | $\approx$ 30                                        | $\approx$ 7                                                                | -                                                | 5.3-5.7        | Appl. Catal. B <b>2008</b> , 83, 131-139           |
| 13 | Fe-Pt                                                                                       | 23                                                  | -                                                                          | -                                                | 5.5            | J. Nanopart. Res. <b>2012</b> , 14, 956-965        |
| 14 | $\alpha$ -Fe <sub>2</sub> O <sub>3</sub> (plate) + Fe (II)                                  | 95.5                                                | -                                                                          | -                                                | 4.7            | Appl. Catal. B <b>2016</b> , 181, 127-137          |
| 15 | $\alpha$ -Fe <sub>2</sub> O <sub>3</sub> (rod) + Fe (II)                                    | 143.6                                               | -                                                                          | -                                                | 4.7            | Appl. Catal. B <b>2016</b> , 181, 127-137          |
| 16 | Immobilized iron oxide                                                                      | 1.8                                                 | -                                                                          | -                                                | 4              | Appl. Catal. A <b>2008</b> , 346, 140-148          |
| 17 | Fe <sub>2</sub> O <sub>3</sub> /Al <sub>2</sub> O <sub>3</sub>                              | -                                                   | -                                                                          | 0.037                                            | 12             | J. Phys. Chem. <b>1978</b> , 82, 1505-1509         |
| 18 | Fe <sub>2</sub> O <sub>3</sub> /Al <sub>2</sub> O <sub>3</sub>                              | -                                                   | -                                                                          | 0.013-0.031                                      | 9              | Int. J. Chem. Kinet. <b>1990</b> , 22, 963-974.    |
| 19 | Fe <sub>2</sub> O <sub>3</sub> /Al <sub>2</sub> O <sub>3</sub> /mesoporous SiO <sub>2</sub> | 0.782                                               | 3.91                                                                       | -                                                | 4.1            | Chem. Commun. <b>2006</b> , 463-465                |
| 20 | Fe <sub>3</sub> O <sub>4</sub> /MWCNT                                                       | 1.44                                                | 0.72                                                                       | -                                                | 5.0            | Appl. Catal. B <b>2011</b> , 107, 274-283          |
| 21 | Fe <sub>3</sub> O <sub>4</sub> /mesoporous carbon                                           | < 0.44                                              | < 4.4                                                                      | -                                                | 3.0            | Chemosphere <b>2012</b> , 89, 1230-1237            |
| 22 | Support-iron oxide                                                                          | 0.22                                                | 0.022                                                                      | -                                                | 5.4            | Appl. Catal. A <b>1999</b> , 185, 237-245          |
| 23 | <b>Fe<sub>3</sub>O<sub>4</sub>/Fe/Fe<sub>3</sub>C@PCNF</b>                                  | <b>604.28</b>                                       | <b>839.8</b>                                                               | <b>7.776</b>                                     | <b>5.8-5.9</b> | <b>This work</b>                                   |

1. [H<sub>2</sub>O<sub>2</sub>]<sub>0</sub> = 0.0011-0.011 M, [catalyst] = 0.2-3 g/L,

2. [H<sub>2</sub>O<sub>2</sub>]<sub>0</sub> = 0.98-17.8 mM, [catalyst] = 1 g/L,

3. [H<sub>2</sub>O<sub>2</sub>]<sub>0</sub> = 500 mg/L, [catalyst] = 12500 mg/L,

3. [H<sub>2</sub>O<sub>2</sub>]<sub>0</sub> = 500 mg/L, [catalyst] = 0.5-12.5 g/L,

4.  $[\text{H}_2\text{O}_2]_0 = 0.02 \text{ M}$ ,  $[\text{catalyst}] = 1 \text{ g/L}$ ,
5.  $[\text{H}_2\text{O}_2]_0 = 0.98\text{-}17.8 \text{ mM}$ ,  $[\text{catalyst}] = 1 \text{ g/L}$ ,
6.  $[\text{H}_2\text{O}_2]_0 = 0.02 \text{ M}$ ,  $[\text{catalyst}] = 1 \text{ g/L}$ ,
7.  $[\text{H}_2\text{O}_2]_0 = 500 \text{ mg/L}$ ,  $[\text{catalyst}] = 1250 \text{ mg/L}$ ,
8.  $[\text{H}_2\text{O}_2]_0 = 5.88 \text{ mM}$ ,  $[\text{catalyst}] = 1 \text{ g/L}$ ,
9.  $[\text{H}_2\text{O}_2]_0 = 500 \text{ mg/L}$ ,  $[\text{catalyst}] = 500 \text{ mg/L}$ ,
10.  $[\text{H}_2\text{O}_2]_0 = 3.5\%$ ,  $[\text{catalyst}] = 5 \text{ ppm}$ ,
- 11&12.  $[\text{H}_2\text{O}_2]_0 = 2.7 \text{ M}$ ,  $\text{catalyst} = 30 \text{ mg}$ ,
13.  $[\text{H}_2\text{O}_2]_0 = 3.5\%$ ,  $[\text{catalyst}] = 5 \text{ ppm}$ ,
- 14&15.  $[\text{H}_2\text{O}_2]_0 = 0.05 \text{ mM}$ ,  $[\text{catalyst}] = 0.4 \text{ g/L}$ ,
16.  $[\text{H}_2\text{O}_2]_0 = 550 \text{ mg/L}$ ,  $\text{catalyst} = 20 \text{ g}$ ,
17.  $[\text{H}_2\text{O}_2]_0 = 7\text{-}15 \text{ cm}^3/\text{min}$ ,  $\text{catalyst} = 0.5\text{-}1.5 \text{ g}$ ,
18.  $[\text{H}_2\text{O}_2]_0 = 0.1 \text{ M}$ ,  $\text{catalyst} = 0.05 \text{ g}$ ,
19.  $[\text{H}_2\text{O}_2]_0 = 5 \text{ mM}$ ,  $[\text{catalyst}] = 0.2 \text{ g/L}$ ,
20.  $[\text{H}_2\text{O}_2]_0 = 5.3 \text{ mM}$ ,  $[\text{catalyst}] = 2 \text{ g/L}$ ,
21.  $[\text{H}_2\text{O}_2]_0 = 10 \text{ mM}$ ,  $[\text{catalyst}] = 0.1 \text{ g/L}$ ,
22.  $[\text{H}_2\text{O}_2]_0 = 23.5 \text{ mM}$ ,  $[\text{catalyst}] = 10 \text{ g/L}$ ,
23.  $[\text{H}_2\text{O}_2]_0 = 40 \text{ mM}$ ,  $[\text{catalyst}] = 0.125\text{-}0.75 \text{ g/L}$ .

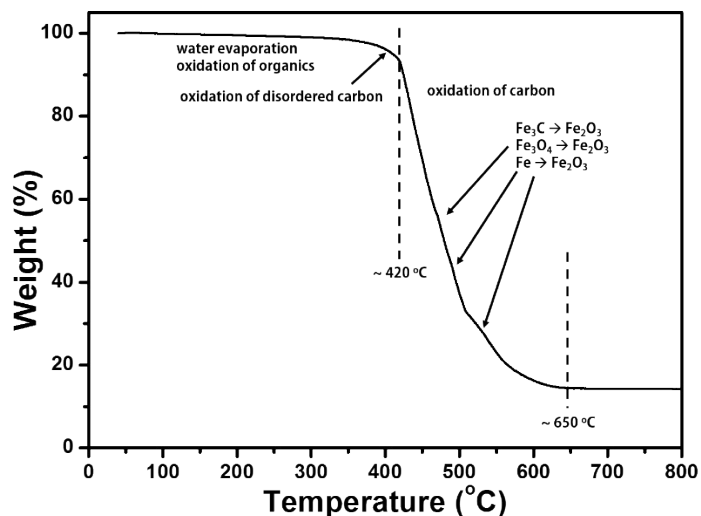

Figure S3. Thermogravimetric analysis (TGA) curve of  $\text{Fe}_3\text{O}_4/\text{Fe}/\text{Fe}_3\text{C}@PCNF$  measured in air.

The Fe content was calculated based on the TGA curve of  $\text{Fe}_3\text{O}_4/\text{Fe}/\text{Fe}_3\text{C}@PCNF$ . By heating  $\text{Fe}_3\text{O}_4/\text{Fe}/\text{Fe}_3\text{C}@PCNF$  in air, the adsorbed water molecules and organic matters were evaporated to cause slight but steady weight loss until  $\sim 300$  °C. The ramp of weight loss, which increases at approximately 400-420 °C, is due to oxidation of the amorphous carbon part of  $\text{Fe}_3\text{O}_4/\text{Fe}/\text{Fe}_3\text{C}@PCNF$  [1]. Above 420 °C, the steepest weight loss response was observed; this response was attributed to the oxidation of graphitic carbon of  $\text{Fe}_3\text{O}_4/\text{Fe}/\text{Fe}_3\text{C}@PCNF$  until no weight change was observed at  $\sim 650$  °C [2-4]. During the oxidation of carbon, iron species ( $\text{Fe}_3\text{O}_4$ , Fe,  $\text{Fe}_3\text{C}$ , and  $\alpha\text{-Fe}_2\text{O}_3$ ) of  $\text{Fe}_3\text{O}_4/\text{Fe}/\text{Fe}_3\text{C}@PCNF$  experienced oxidation, which led to the phase transition to iron oxides. The slight weight increase due to oxygen incorporation in these iron species could be observed as several bumps in the TGA curve (at  $\sim 460$ , 480, and 530 °C) [2-4]. In the temperature region of  $\sim 650$  to 800 °C, no further weight loss occurred, with the remaining 14.31% being the residual material. This result can be explained as follows: when heating  $\text{Fe}_3\text{O}_4/\text{Fe}/\text{Fe}_3\text{C}@PCNF$  to 800 °C in air, all carbonaceous materials are oxidized and

evaporated, while iron species are oxidized to a stable iron oxide form, which remained as a residual material. It is well known that iron species ultimately oxidize to  $\alpha$ -Fe<sub>2</sub>O<sub>3</sub> under 800 °C heating in air; therefore, the residual material was assumed to be all  $\alpha$ -Fe<sub>2</sub>O<sub>3</sub> [5-8]. Considering the molecular weights of Fe and O and the stoichiometry of Fe<sub>2</sub>O<sub>3</sub>, it is conclusive that the Fe content of Fe<sub>3</sub>O<sub>4</sub>/Fe/Fe<sub>3</sub>C@PCNF was 10.02%. Based on this observation, the  $k_{mass}$  was calculated to be 7.776 M<sup>-1</sup> s<sup>-1</sup>.



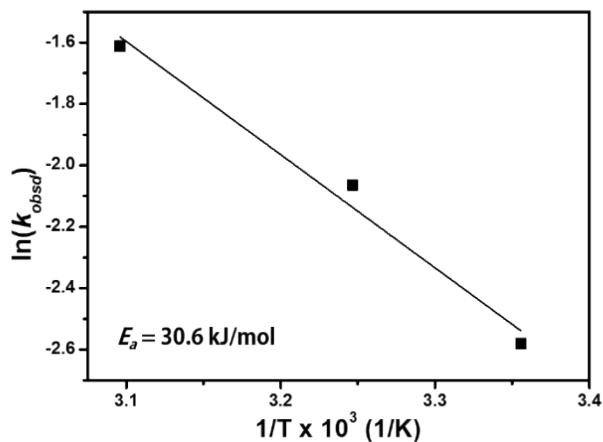

Figure S4. Arrhenius plot derived from H<sub>2</sub>O<sub>2</sub> decomposition by Fe<sub>3</sub>O<sub>4</sub>/Fe/Fe<sub>3</sub>C@PCNF performed at different solution temperatures (25, 35, and 50 °C).

The Arrhenius equation written below was utilized to evaluate the activation energy ( $E_a$ ) of the catalytic reaction.

$$k = Ae^{-E_a/(RT)} \rightarrow \ln(k) = \frac{-E_a}{R} \left( \frac{1}{T} \right) + \ln(A) \quad (1)$$

The quantity  $\ln(k_{obsd})$  was plotted as function of  $1/T$ , and a linear regression was taken by three values of  $k_{obsd}$  measured at 25, 35, and 50 °C ( $R^2 = 0.97$ ).  $E_a$  was calculated as 30.6 kJ/mol from the slope ( $-E_a/R$ ) of the linear regression line.

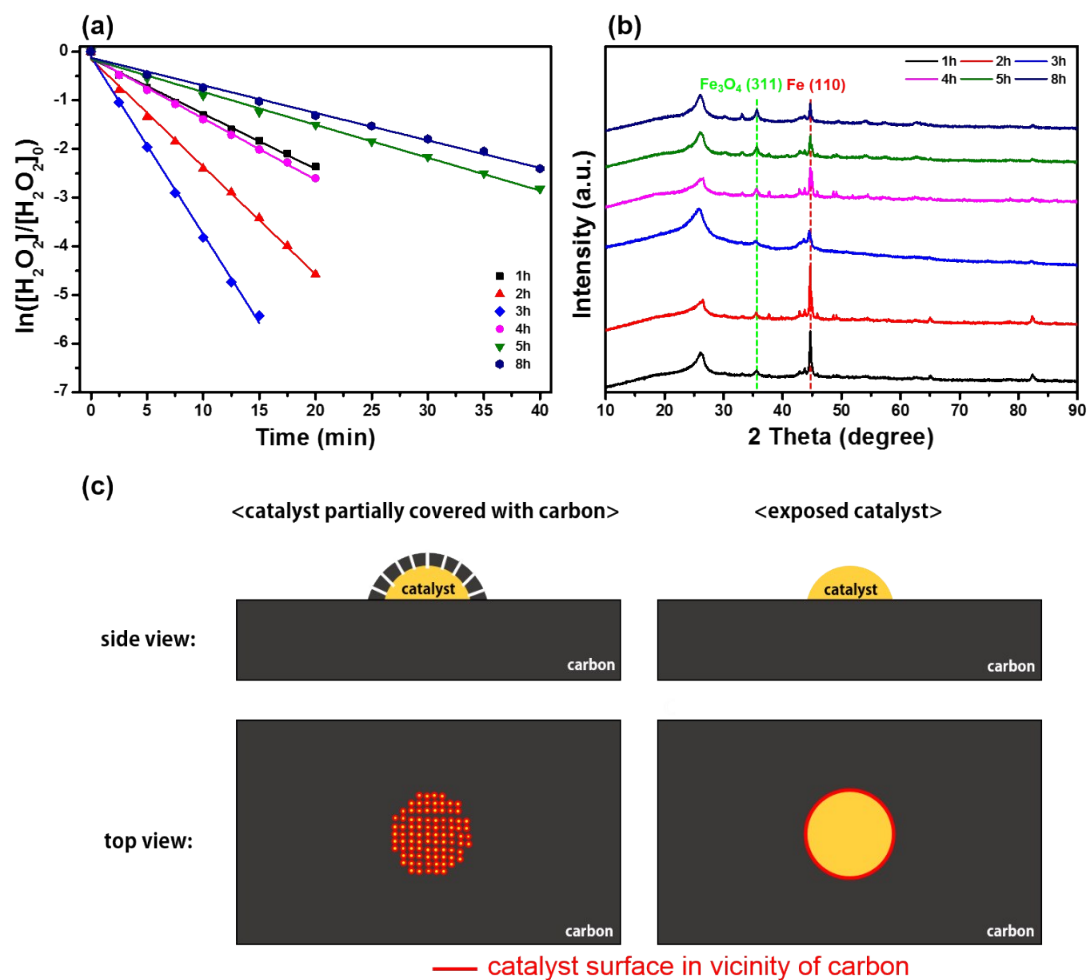

Fi

Figure S5. (a)  $\ln([H_2O_2]/[H_2O_2]_0)$  vs. time plot and (b) XRD patterns of Fe<sub>3</sub>O<sub>4</sub>/Fe/Fe<sub>3</sub>C@PCNF activated at 300 °C for different time durations. (c) Illustration for comprehensive understanding of the proposed mechanism.

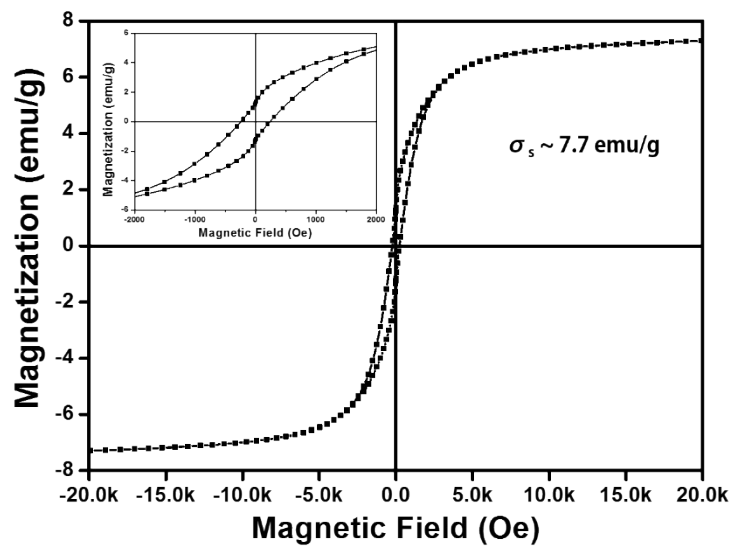

Figure S6. B-H curve of Fe<sub>3</sub>O<sub>4</sub>/Fe/Fe<sub>3</sub>C@PCNF. Inset shows high magnification of -2 kOe to 2 kOe range.

The B-H curve exhibited a hysteresis loop that indicated the ferromagnetic behavior of Fe<sub>3</sub>O<sub>4</sub>/Fe/Fe<sub>3</sub>C@PCNF. The saturation magnetization ( $\sigma_s$ ) was estimated as 7.7 emu/g, which indicated that Fe<sub>3</sub>O<sub>4</sub>/Fe/Fe<sub>3</sub>C@PCNF possessed a high enough magnetic moment to be separated by a magnet. The motion picture shows the efficient separation of Fe<sub>3</sub>O<sub>4</sub>/Fe/Fe<sub>3</sub>C@PCNF by a magnet, which was dispersed in water after the H<sub>2</sub>O<sub>2</sub> decomposition experiment.

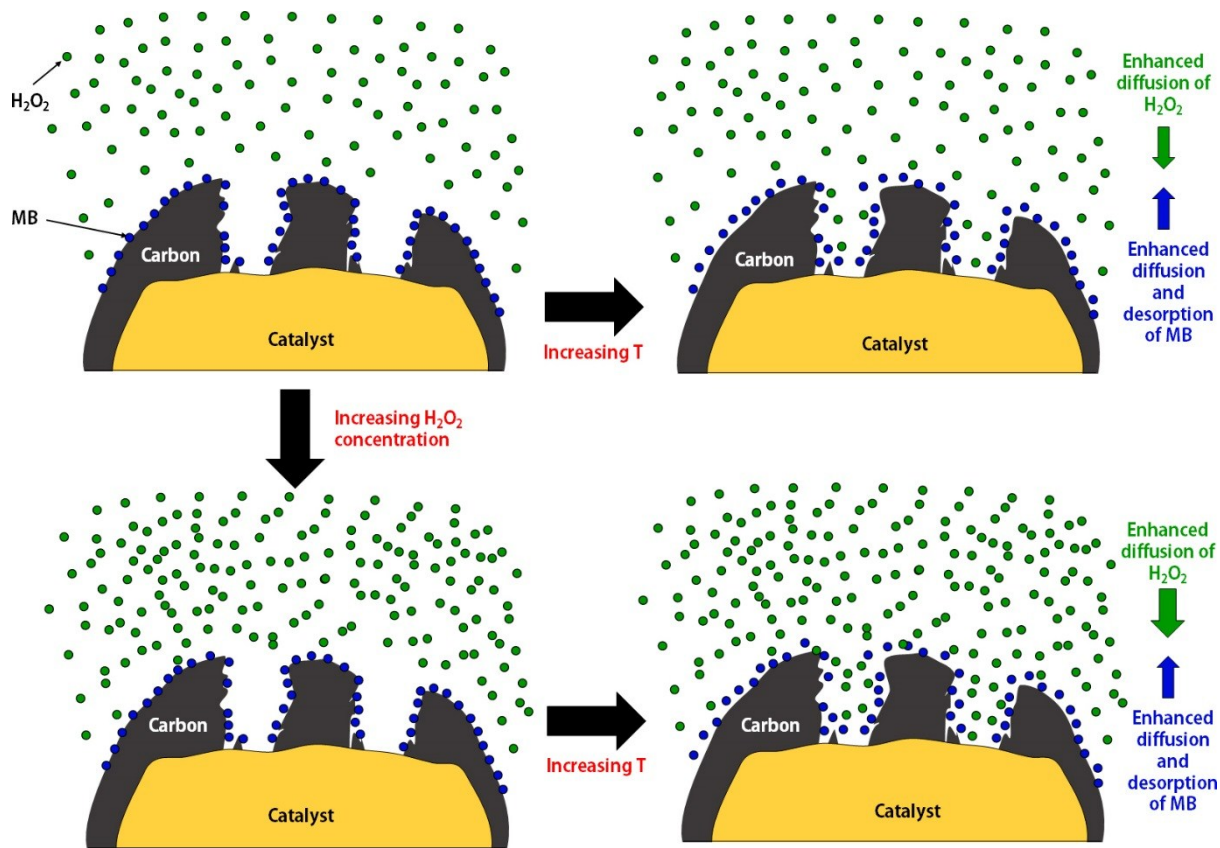

Figure S7. Representative illustration of MB catalytic removal with Fe<sub>3</sub>O<sub>4</sub>/Fe/Fe<sub>3</sub>C@PCNF by increasing the solution temperature and H<sub>2</sub>O<sub>2</sub> concentration.

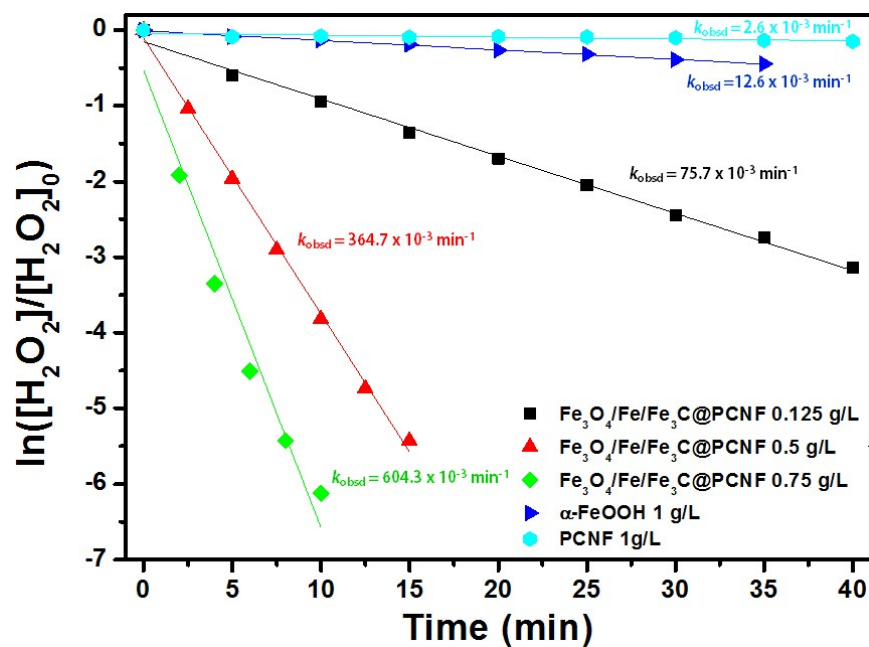

Figure S8.  $\ln([H_2O_2]/[H_2O_2]_0)$  vs. time plot of  $\alpha$ -FeOOH and PCNF ( $Fe_3O_4/Fe/Fe_3C@PCNF$  plotted for comparison).

The  $k_{obsd}$  of PCNF and  $\alpha$ -FeOOH (goethite, catalyst grade, 30-50 mesh, Sigma-Aldrich) was measured to compare with  $Fe_3O_4/Fe/Fe_3C@PCNF$ . PCNF and  $\alpha$ -FeOOH showed  $k_{obsd} = 2.6 \times 10^{-3}$  and  $12.6 \times 10^{-3} \text{ min}^{-1}$ , which were a relatively low value compared to  $Fe_3O_4/Fe/Fe_3C@PCNF$ . PCNF was fabricated by the same procedure explained in the experimental section without including the iron acetylacetonate.

The radical species produced from  $\text{H}_2\text{O}_2$  decomposition with  $\text{Fe}_3\text{O}_4/\text{Fe}/\text{Fe}_3\text{C}@PCNF$  at room temperature was observed by EPR method. For the experiment, 1 g/L of  $\text{Fe}_3\text{O}_4/\text{Fe}/\text{Fe}_3\text{C}@PCNF$  was added in 0.32 M  $\text{H}_2\text{O}_2$  aqueous solution and an extraction was taken immediately and 10 min after the reaction was started. After filtering  $\text{Fe}_3\text{O}_4/\text{Fe}/\text{Fe}_3\text{C}@PCNF$  from the extraction, 5, 5-dimethyl-1-pyrroline N-oxide (DMPO) was added as a spin trapping agent. Figure R1 shows the EPR signal of the radical species detected by EPR. The EPR spectra displayed a 4-fold peak with intensity ratio of 1:2:2:1. Furthermore, the hyperfine splitting constant  $a_N$  and  $a_H^\beta$  was equivalent as 15 G. From these facts, it was verified that DMPO-OH• adduct was detected, indicating that hydroxyl radicals ( $\text{OH}\cdot$ ) were mainly formed by decomposition of  $\text{H}_2\text{O}_2$  with  $\text{Fe}_3\text{O}_4/\text{Fe}/\text{Fe}_3\text{C}@PCNF$  at room temperature [Chem. Eng. J., 2014, 236, 251].

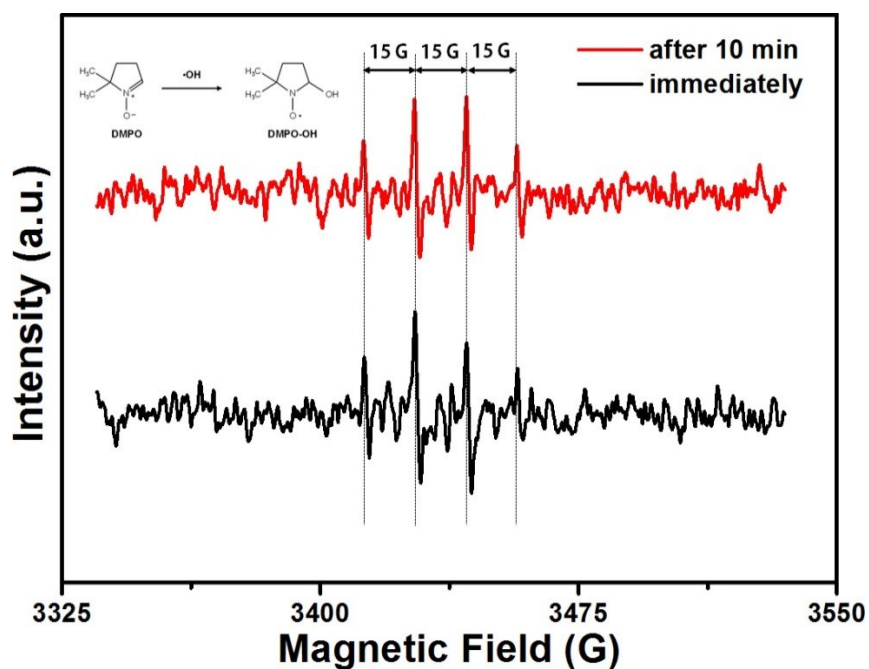

Figure S9. EPR spectra of DMPO-OH• adduct derived from  $\text{OH}\cdot$  which was formed by  $\text{H}_2\text{O}_2$  decomposition with  $\text{Fe}_3\text{O}_4/\text{Fe}/\text{Fe}_3\text{C}@PCNF$ .

The blank test for MB adsorption was conducted by adding  $\text{Fe}_3\text{O}_4/\text{Fe}/\text{Fe}_3\text{C}@\text{PCNF}$  in the MB solution (100 mg/L, 85 °C) without adding  $\text{H}_2\text{O}_2$ . As shown in Figure R2, around 75% of MB was removed by adsorption within 10 min and small amounts were gradually removed afterward. Therefore, it was verified that the adsorptive removal was nearly saturated within 30 min before adding  $\text{H}_2\text{O}_2$  according to our experimental procedure. The blank test for MB removal by  $\text{H}_2\text{O}_2$  thermal decomposition was conducted by adding 0.32 M  $\text{H}_2\text{O}_2$  in the MB solution (100 mg/L) at 85 °C (Figure R2). The MB concentration did not change during the experiment, which indicated that the thermal decomposition of  $\text{H}_2\text{O}_2$  did not lead to MB removal.

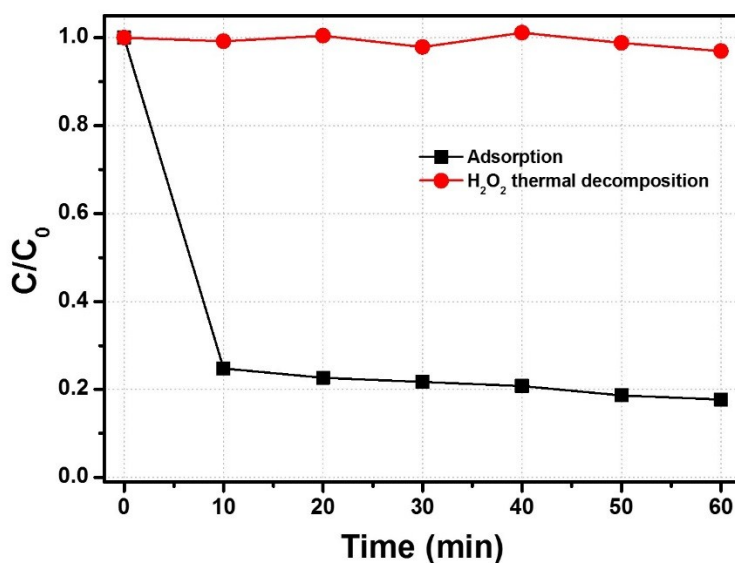

Figure S10. Removal curve of MB with  $\text{Fe}_3\text{O}_4/\text{Fe}/\text{Fe}_3\text{C}@\text{PCNF}$  prepared by activation at 300 °C for 8 h. The adsorption was conducted at 85 °C. The  $\text{H}_2\text{O}_2$  thermal decomposition test was conducted for 0.32 M  $\text{H}_2\text{O}_2$  at 85 °C.

The pH 5.4 and 4.5 was the natural pH when 0.04 and 0.32 M H<sub>2</sub>O<sub>2</sub> was added to MB solutions, respectively. Additional experiments were conducted to compare the results at the same pH conditions. The pH 4.5 was chosen for these experiments which was the natural pH of MB solution with addition of 0.32 M H<sub>2</sub>O<sub>2</sub>. In case of 0.04 M H<sub>2</sub>O<sub>2</sub>, the pH was adjusted to 4.5 by adding appropriate amount of HCl. The MB removal curves are shown in Figure R4a and b for two samples (Fe<sub>3</sub>O<sub>4</sub>/Fe/Fe<sub>3</sub>C@PCNF prepared by activation at 300 °C for 3 h and 8 h). At the same pH 4.5 condition, the removal of MB was higher in case of 0.32 M H<sub>2</sub>O<sub>2</sub> compared to 0.04 M H<sub>2</sub>O<sub>2</sub> for both samples. Based on this result, it was once more verified that the removal of MB was enhanced by increasing the H<sub>2</sub>O<sub>2</sub> concentration from 0.04 to 0.32 M for Fe<sub>3</sub>O<sub>4</sub>/Fe/Fe<sub>3</sub>C@PCNF at the same pH condition. The pH change during MB removal was tracked and is shown in Figure 3c. According to the mineralization of MB (1),

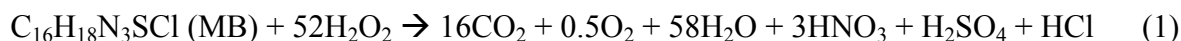

the consumption of H<sub>2</sub>O<sub>2</sub> led to the formation of acidic products (HNO<sub>3</sub>, H<sub>2</sub>SO<sub>4</sub>, and HCl). Therefore, the pH was gradually decreased to ~ 4.1 after 30 min.

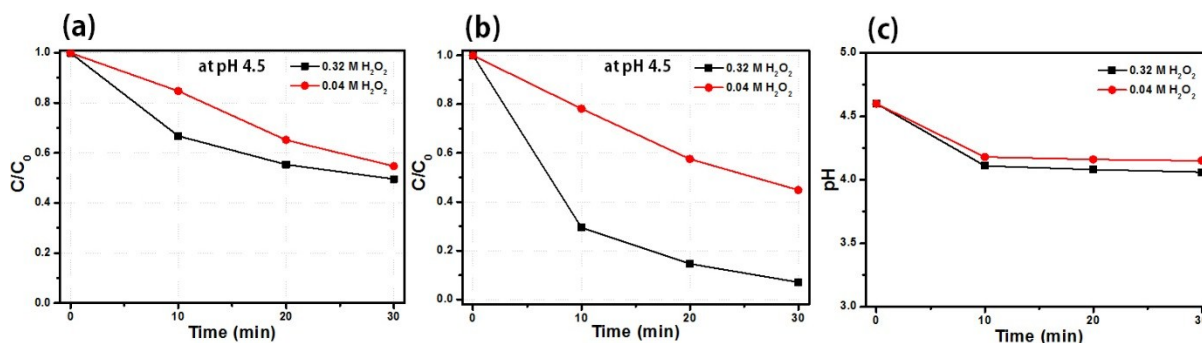



Figure S11. Removal curve of MB with  $\text{Fe}_3\text{O}_4/\text{Fe}/\text{Fe}_3\text{C}@PCNF$  prepared by activation at  $300\text{ }^\circ\text{C}$  for (a) 3 h and (b) 8 h tested at different  $\text{H}_2\text{O}_2$  concentrations. The experiment was conducted at  $25\text{ }^\circ\text{C}$  and initial pH 4.5. (c) The pH plot of (b).

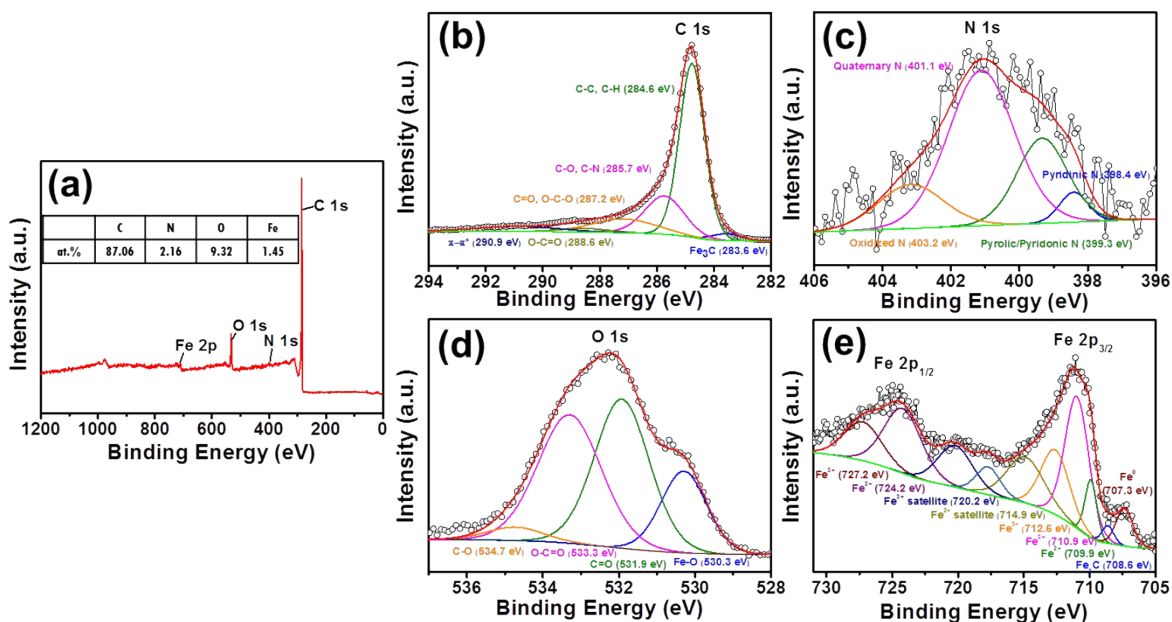

Figure S12. X-ray photoelectron spectra of  $\text{Fe}_3\text{O}_4/\text{Fe}/\text{Fe}_3\text{C}@PCNF$  activated at  $300\text{ }^\circ\text{C}$ . (a) Survey scan, peak deconvolution of (b) C1s, (c) N1s, (d) O1s, and (e)  $\text{Fe}2p_{1/2}$  &  $\text{Fe}2p_{3/2}$ . All deconvoluted peaks are assigned with its chemical bonds.

## References

- [1] K.L. Strong, D.P. Anderson, K. Lafdi, J.N. Kuhn, Purification process for single-wall carbon nanotubes, *carbon*, 41 (2003) 1477-1488.
- [2] Y.-G. Huang, X.-L. Lin, X.-H. Zhang, Q.-C. Pan, Z.-X. Yan, H.-Q. Wang, J.-J. Chen, Q.-Y. Li, Fe<sub>3</sub>C@ carbon nanocapsules/expanded graphite as anode materials for lithium ion batteries, *Electrochimica Acta*, 178 (2015) 468-475.
- [3] Y. Hu, J.O. Jensen, W. Zhang, L.N. Cleemann, W. Xing, N.J. Bjerrum, Q. Li, Hollow spheres of iron carbide nanoparticles encased in graphitic layers as oxygen reduction catalysts, *Angewandte Chemie International Edition*, 53 (2014) 3675-3679.
- [4] F. Magalhães, M. Pereira, J. Fabris, S. Bottrel, M. Sansiviero, A. Amaya, N. Tancredi, R. Lago, Novel highly reactive and regenerable carbon/iron composites prepared from tar and hematite for the reduction of Cr (VI) contaminant, *Journal of hazardous materials*, 165 (2009) 1016-1022.
- [5] S. Zhang, M. Zeng, J. Li, J. Li, J. Xu, X. Wang, Porous magnetic carbon sheets from biomass as an adsorbent for the fast removal of organic pollutants from aqueous solution, *Journal of Materials Chemistry A*, 2 (2014) 4391-4397.
- [6] J. Wang, H. Zhou, J. Zhuang, Q. Liu, Magnetic  $\gamma$ -Fe<sub>2</sub>O<sub>3</sub>, Fe<sub>3</sub>O<sub>4</sub>, and Fe nanoparticles confined within ordered mesoporous carbons as efficient microwave absorbers, *Physical Chemistry Chemical Physics*, 17 (2015) 3802-3812.
- [7] C. Fu, A. Mahadevegowda, P.S. Grant, Fe<sub>3</sub>O<sub>4</sub>/carbon nanofibres with necklace architecture for enhanced electrochemical energy storage, *Journal of Materials Chemistry A*, 3 (2015) 14245-14253.

- [8] M. Krajewski, K. Brzozka, W. Lin, H. Lin, M. Tokarczyk, J. Borysiuk, G. Kowalski, D. Wasik, High temperature oxidation of iron–iron oxide core–shell nanowires composed of iron nanoparticles, *Physical Chemistry Chemical Physics*, 18(2016) 3900-3909.
- [9] X. Zhang, Y. Ding, H. Tang, X. Han, L. Zhu, N. Wang, Degradation of bisphenol A by hydrogen peroxide activated with  $\text{CuFeO}_2$  microparticles as a heterogeneous Fenton-like catalyst: Efficiency, stability and mechanism, *Chemical Engineering Journal*, 236(2014) 251-262.
- [10] G. C. Allen, M. T. Curtis, A. J. Hooper, P. M. Tucker, X-Ray photoelectron spectroscopy of iron–oxygen systems, *J. Chem. Soc. Dalton Trans.* (1974) 1525.
- [11] G. Ertl, K. Wandelt, Electron spectroscopic studies of clean and oxidized iron, *Surf. Sci.* (1975) 50, 479.
